# Supplementary material for: A 25-year climatology of low-tropospheric temperature and humidity inversions for contrasting synoptic regimes at Neumayer Station, Antarctica
Source: Copernicus journal article supplement (doi:10.5194/wcd-2021-22), 2021-05-10
Supplement: Supplementary file 1 [file wcd-2021-22-supplement.pdf]

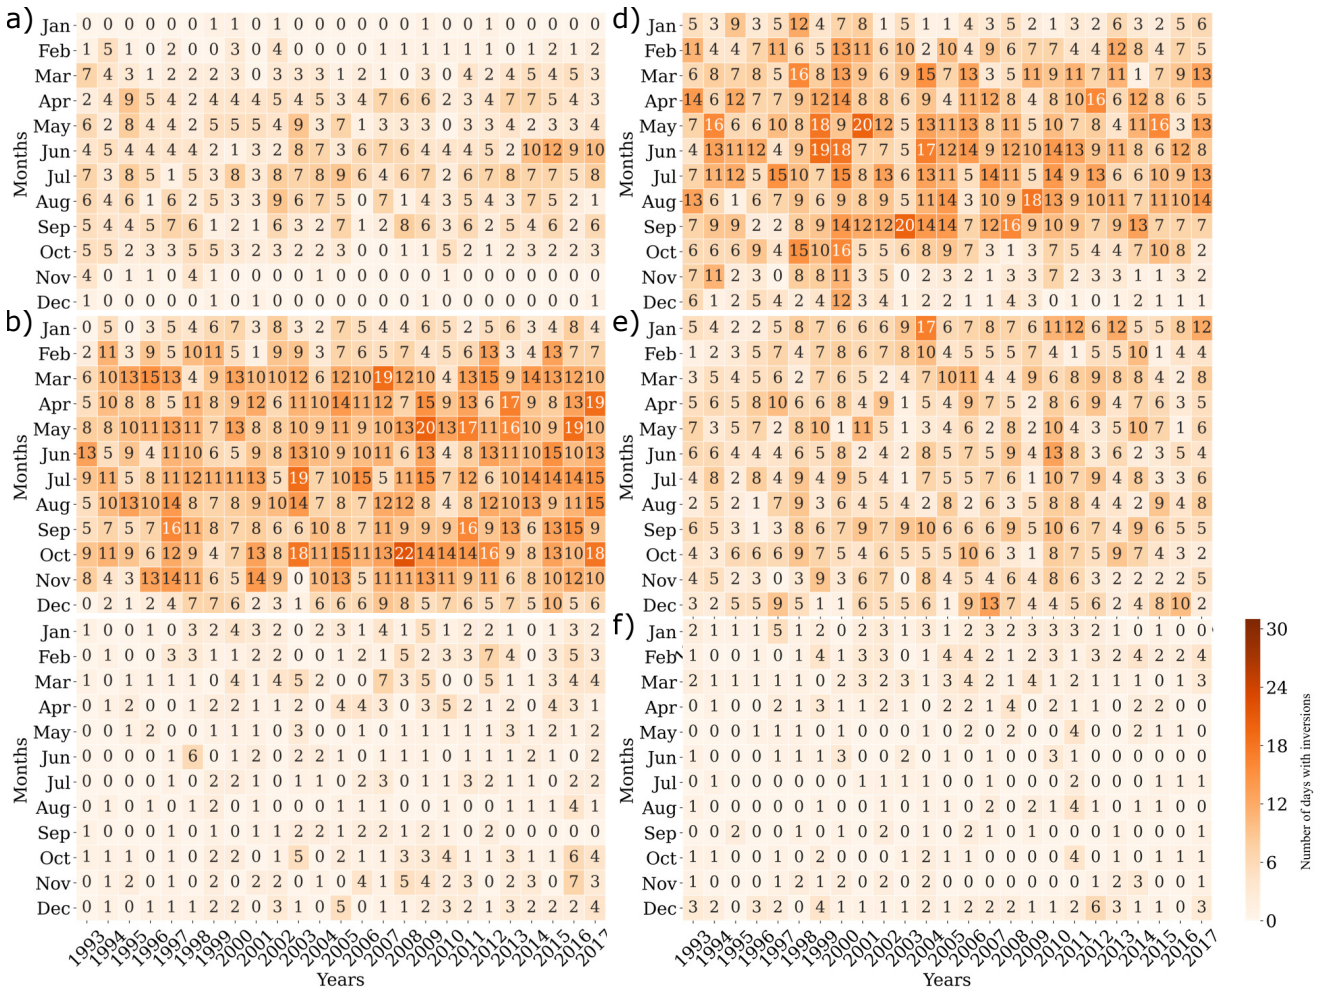

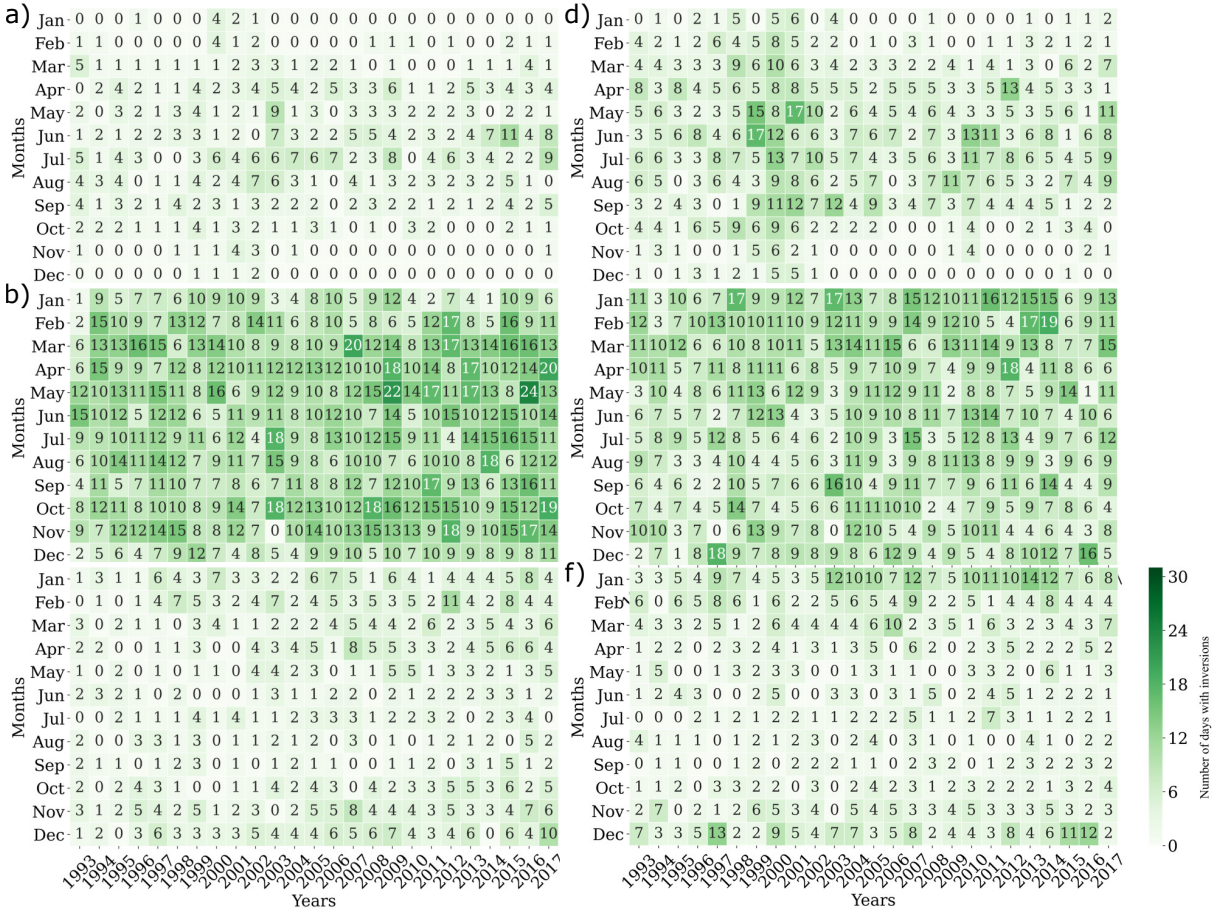

**Figure S2.** Monthly distribution of days with humidity inversions between 1993-2017 at the three different levels (first level: a and d; second level: b and e; third level: c and f) for cyclonic (a,b,c) and non-cyclonic (d,e,f) conditions
